# Supplementary material for: Genome-wide systematic identification of methyltransferase recognition and modification patterns
Source: PubMed Central journal article supplement (PMC6700114; doi:10.1038/s41467-019-11179-9), 2019-08-19
Supplement: 41467_2019_11179_MOESM3_ESM.pdf [file 41467_2019_11179_MOESM3_ESM.pdf]

## **Description of Additional Supplementary Files**

File Name: Supplementary Data 1

Description: Raw data from methylation detection. Assembly of data presented in motif\_summary.csv files

File Name: Supplementary Data 2

Description: List of strains and plasmids used in this study

File Name: Supplementary Data 3

Description: List of primers used in this study
